# Supplementary material for: Silver-free synthesis of nitrate-containing room-temperature ionic liquids
Source: Royal Society of Chemistry journal article supplement (doi:10.1039/c0nj00881h), 2011-01-01
Supplement: c0nj00881h.pdf [file c0nj00881h.pdf]

## Supporting Information

### Silver-free synthesis of nitrate-containing room-temperature ionic liquids

Nicholas W. Smith, Sai P. Gourisankar, Jean-Luc Montchamp and Sergei V. Dzyuba

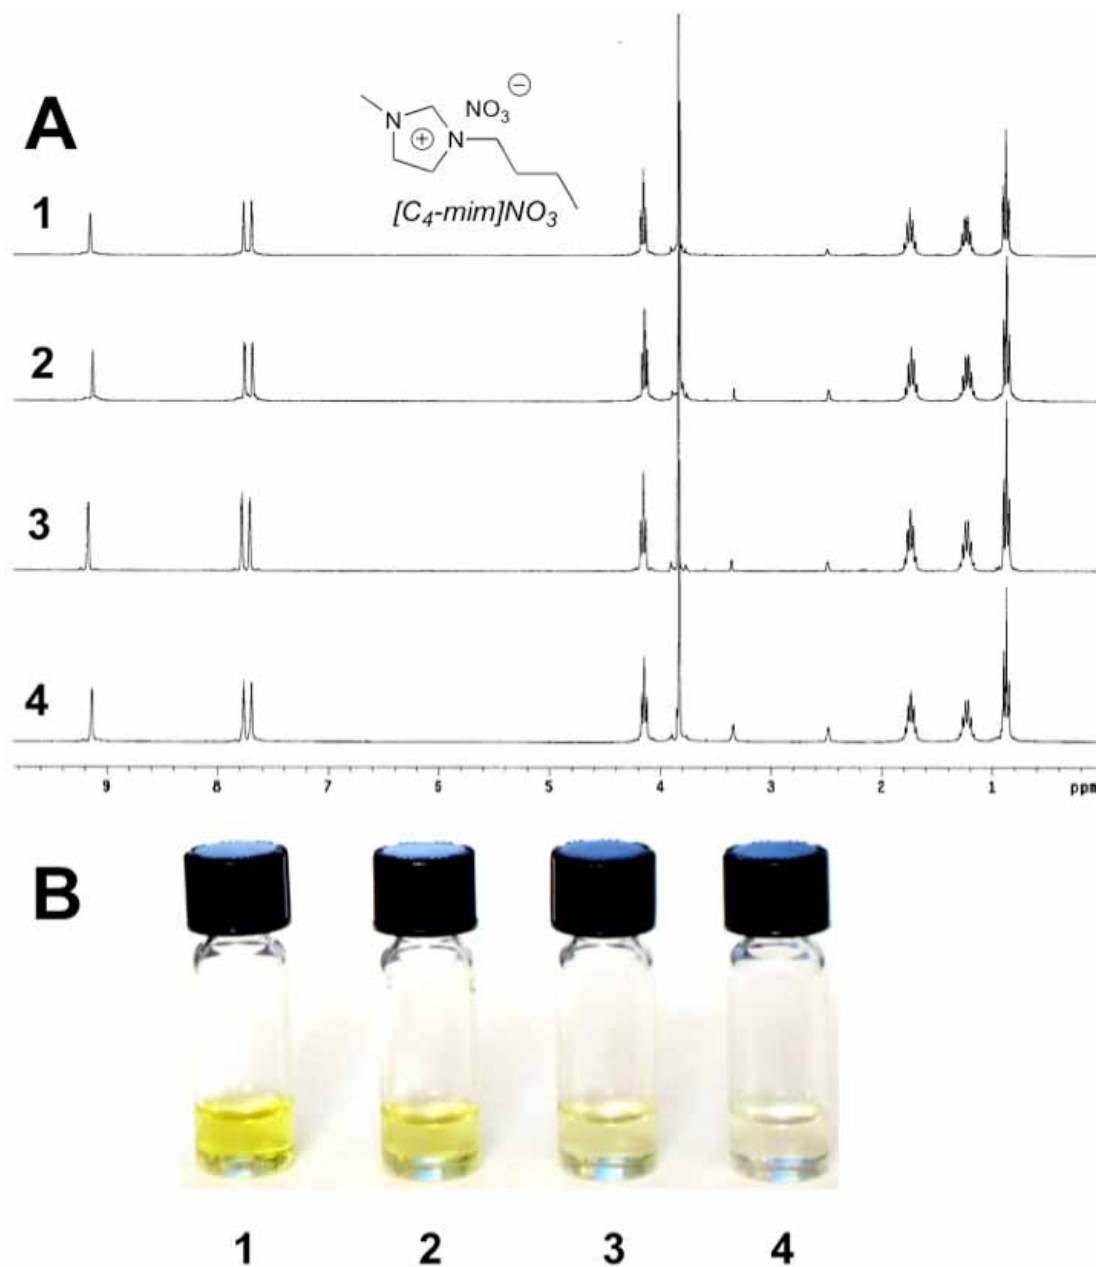

**Figure S1.** A: <sup>1</sup>H NMR spectra of [C<sub>4</sub>-mim]NO<sub>3</sub> in DMSO-d<sub>6</sub>; B: Photographs of various samples of [C<sub>4</sub>-mim]NO<sub>3</sub>:

**1** – crude reaction mixture; **2** – **1** after charcoal/CH<sub>2</sub>Cl<sub>2</sub>; **3** – **1** after charcoal/CH<sub>3</sub>CN; **4** – **1** after charcoal/H<sub>2</sub>O (see Figure 1 and main text for details)

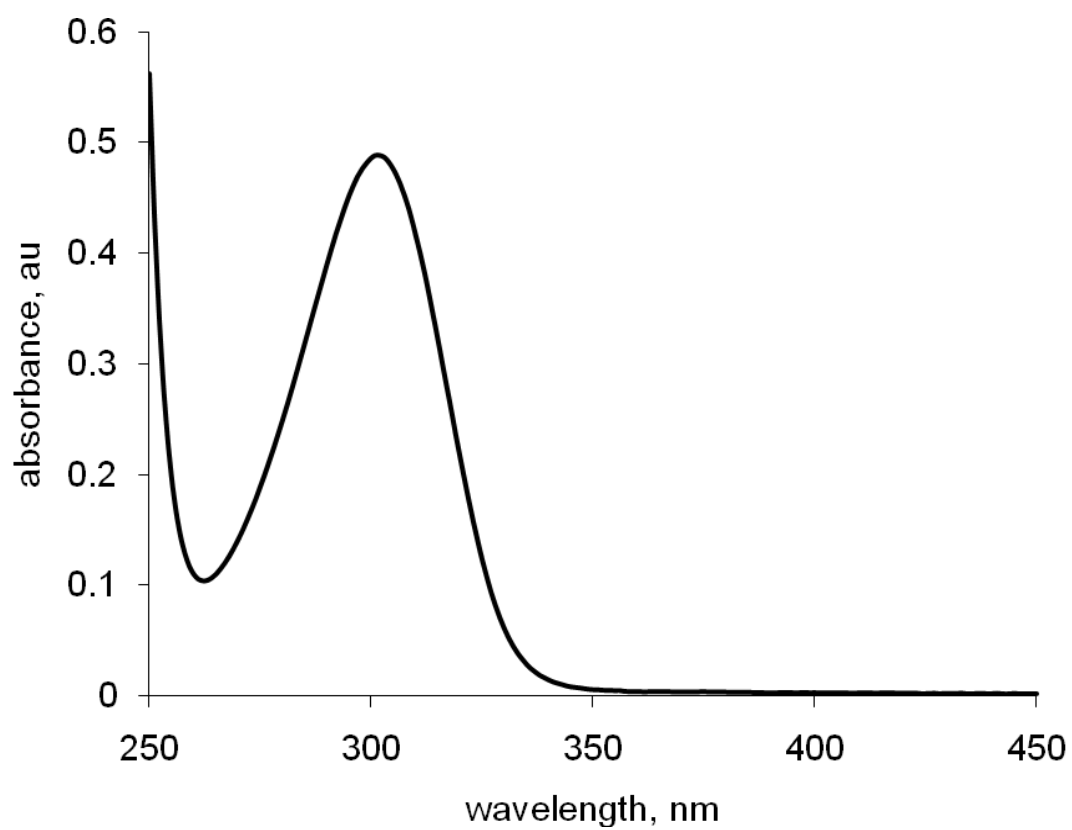

**Figure S2.** Absorbance spectrum of 0.7 M solution of KNO<sub>3</sub> in water (0.1 cm cell).

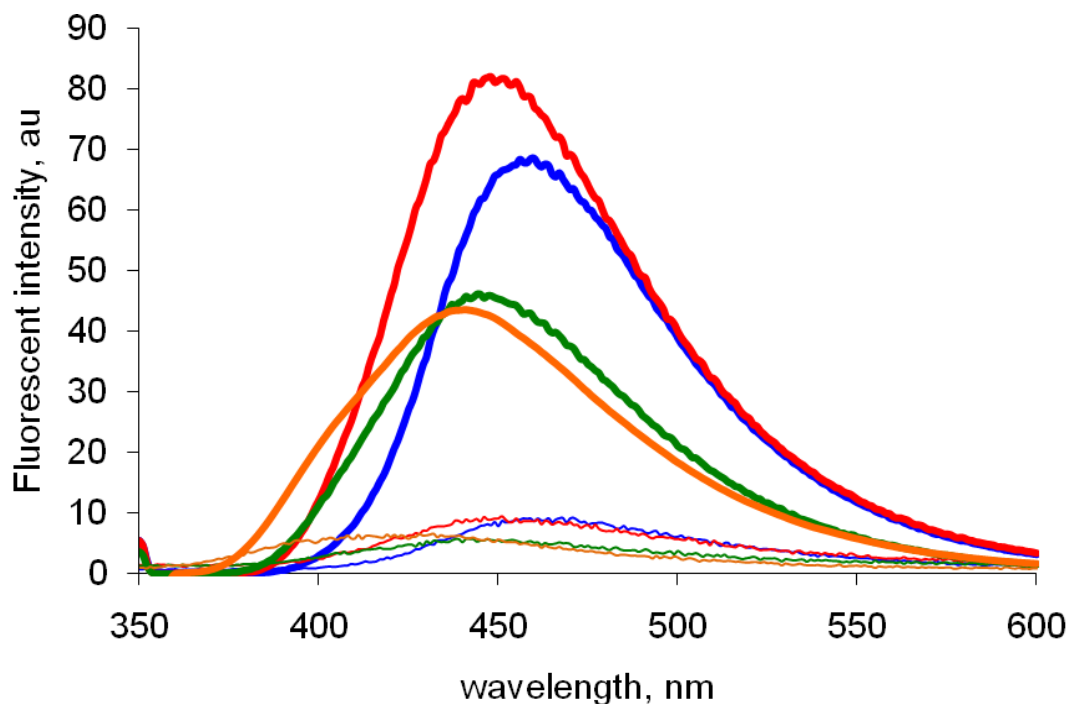

**Figure S3.** Emission spectra of neat [C<sub>4</sub>-mim]NO<sub>3</sub> ionic liquid: **crude reaction mixture**; **after charcoal/CH<sub>2</sub>Cl<sub>2</sub> treatment**; **after charcoal/CH<sub>3</sub>CN treatment**; **after charcoal/H<sub>2</sub>O treatment**; Thick lines –  $\lambda_{\text{ex}} = 250\text{nm}$ ; thin lines –  $\lambda_{\text{ex}} = 350\text{nm}$ .
